# Supplementary material for: Aromatic pore surface with multiple adsorption sites for one-step C2H4 acquisition from C2H6/C2H4 mixture
Source: Royal Society of Chemistry journal article supplement (doi:10.1039/d4ta05086j), 2024-01-01
Supplement: d4ta05086j1.pdf [file d4ta05086j1.pdf]

## Supporting Information

### **Aromatic pore surface with multiple adsorption sites for one-step C<sub>2</sub>H<sub>4</sub> acquisition from C<sub>2</sub>H<sub>6</sub>/C<sub>2</sub>H<sub>4</sub> mixture**

*Yongqin Zhu<sup>a,b</sup>, Zhenyu Ji<sup>a,b</sup>, Yunzhe Zhou<sup>a</sup>, Mingyan Wu<sup>a,c,d\*</sup>*

<sup>a</sup> State Key Lab of Structure Chemistry, Fujian Institute of Research on the Structure of Matter, Chinese Academy of Sciences, Fuzhou 350002, China

<sup>b</sup> College of Chemistry, Fuzhou University, Fuzhou, Fujian 350108, China

<sup>c</sup> University of Chinese Academy of Sciences, Beijing, 100049, China

<sup>d</sup> *Fujian College, University of Chinese Academy of Sciences, Fuzhou, Fujian, 350002, China.*

\*Correspondence and requests for materials should be addressed to M.W. (E-mail: [wumy@fjirsm.ac.cn](mailto:wumy@fjirsm.ac.cn)).

## Calculation of selectivity via IAST

Single-site Langmuir-Freundlich (SSLF) model was used to fit the adsorption isotherm of C<sub>2</sub>H<sub>4</sub> and C<sub>2</sub>H<sub>6</sub>:

$$N = A_1 \frac{B_1 p^{c_1}}{1 + B_1 p^{c_1}}$$

Where N represents the adsorption capacity of gas, the unit is mmol/g; P represents pressure, the unit is atm; A<sub>1</sub> is the saturated adsorption capacity of different adsorption sites, the unit is mmol/g; B<sub>1</sub> is Langmuir index; c<sub>1</sub> is the Freundlich index.

Then, according to the ideal gas solution adsorption theory (IAST), the adsorption selectivity of C<sub>2</sub>H<sub>6</sub>/C<sub>2</sub>H<sub>4</sub> (1/99, v/v) was calculated:

$$S_{ads} = \frac{x_1/x_2}{p_1/p_2}$$

## Calculation of isosteric enthalpy of adsorption ( $Q_{st}$ )

The isotherms of C<sub>2</sub>H<sub>4</sub> and C<sub>2</sub>H<sub>6</sub> at 298 K and 273 K are fitted to the Virial equation (Eqn(1)). Then the isovolumetric heat of adsorption ( $Q_{st}$ ) was calculated by Eqn(2) using the fitting parameters.

$$\ln P = \ln N + \frac{1}{T} \sum_{i=0}^m a_i N^i + \sum_{j=0}^m b_j N^j \quad (1)$$

$$Q_{st} = -R \sum_{i=0}^m a_i N^i \quad (2)$$

Where P represents pressure, the unit is mmolHg; N represents the adsorption capacity, and the unit is mmol·g<sup>-1</sup>. T stands for temperature, the unit is K; a and b are adsorption correction coefficients; R represents the ideal gas constant, 8.314 J·mol<sup>-1</sup>·K<sup>-1</sup>.

## Calculation of Separation Potential

The separation potential ( $\Delta q$ ) is a combined metric, which considering both uptake capacity and selectivity. It is defined to quantify mixture separations in fixed bed adsorbers.  $\Delta q$  is defined as  $q_1 y_2 / y_1 - q_2^{1-3}$ , where the  $q_1$  and  $q_2$  represent the molar loadings within the MOF that is in equilibrium with a bulk gas phase mixture with mole fractions  $y_1$ , and  $y_2 = 1 - y_1$ . The physical significance of  $\Delta q$  is that it represents the maximum amount of pure gas that can be recovered during the adsorption phase of fixed bed separations.

## Computational details

The binding sites for C<sub>2</sub>H<sub>4</sub> and C<sub>2</sub>H<sub>6</sub> in Ni-3-F were determined through classical molecular simulations. The single X-ray crystallographic structures were subject to geometry optimization through the CASTEP module implemented with the Materials Studio program, using the generalized gradient approximation (GGA) with the Perdew-Burke-Ernzerhof (PBE) functional and the double numerical plus d-functions (DNP) basis set. The energy, force, and displacement convergence criteria were set as  $1 \times 10^{-5}$  Ha,  $2 \times 10^{-3}$  Ha/Å and  $5 \times 10^{-3}$  Å, respectively. The calculated electrostatic potential for Ni-3-F was mapped onto the Connolly surface with a probe radius of 1.0 Å. Simulated annealing (SA) calculations were performed for a single molecule of C<sub>2</sub>H<sub>4</sub> and C<sub>2</sub>H<sub>6</sub> through a canonical Monte Carlo (NVT) process, and all MOF atoms were kept fixed at their positions throughout the simulations. The initial configurations were further optimized to ensure a more efficient energy landscape scanning for every MOF-C<sub>x</sub>H<sub>x</sub> complex, and the optimized configuration having the lowest energy was used as the global minimum for the subsequent analysis and calculation. The static binding energy (at T= 0 K) was then calculated:  $\Delta E = E_{\text{MOF}} + E_{\text{gas}} - E_{\text{MOF+gas}}$ .

### Calculation of C<sub>2</sub>H<sub>4</sub> production

$$N_{C_2H_4} = FC_i t_i = \frac{F \times y_{C_2H_4} \times \int_{t_1}^{t_2} \left(\frac{C(t)}{C_0}\right) dt}{m} = \frac{F \times y_{C_2H_4} \times S}{m}$$

$F$  refers to the flow rate of the gas mixture,  $y_{C_2H_4}$  refers to the molar fraction of C<sub>2</sub>H<sub>4</sub>, and  $m$  refers to the mass of the adsorbent.  $S$  refer to the area of the highlight region in breakthrough curve.

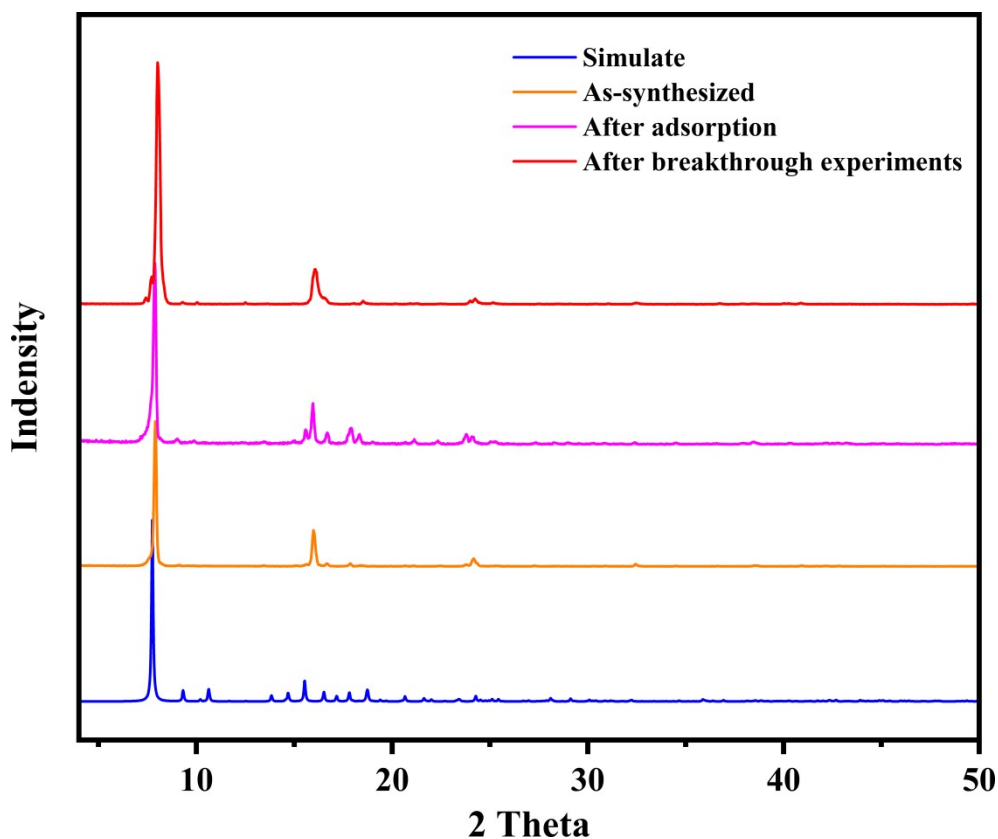

Figure S1. The Powder X-ray diffraction (PXRD) patterns for simulate, as-synthesized, after adsorption and after the breakthrough experiments Ni-3-F.

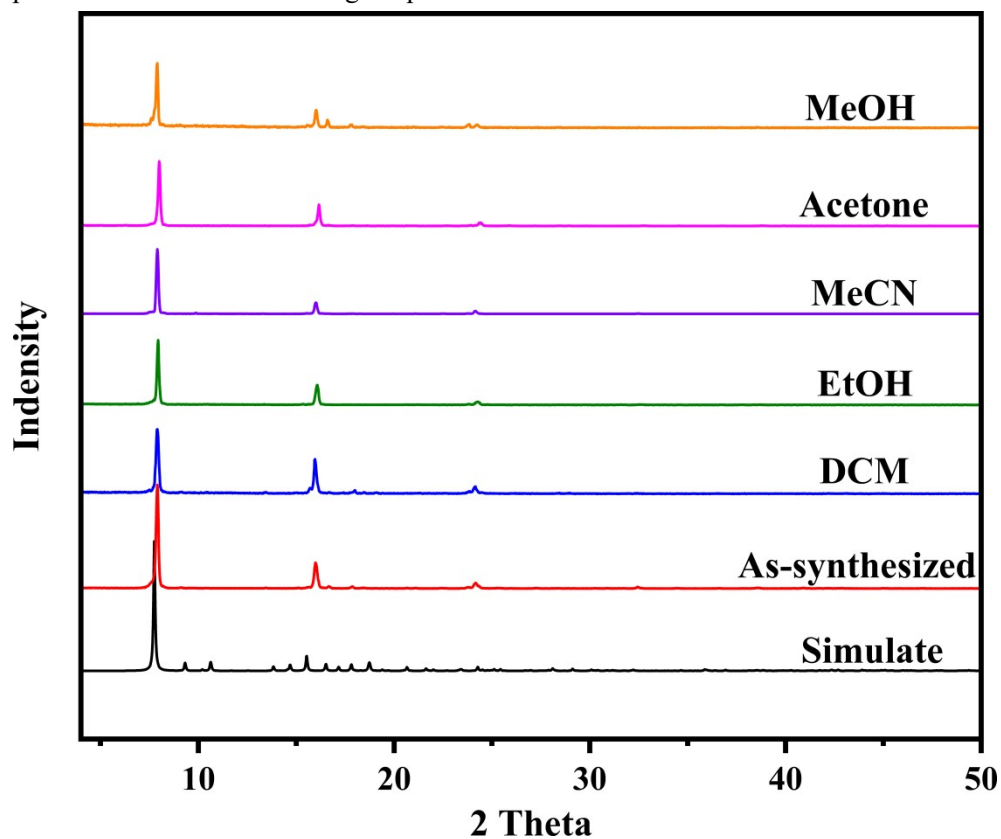

Figure S2. PXRD patterns of Ni-3-F after soaking in different solvents.

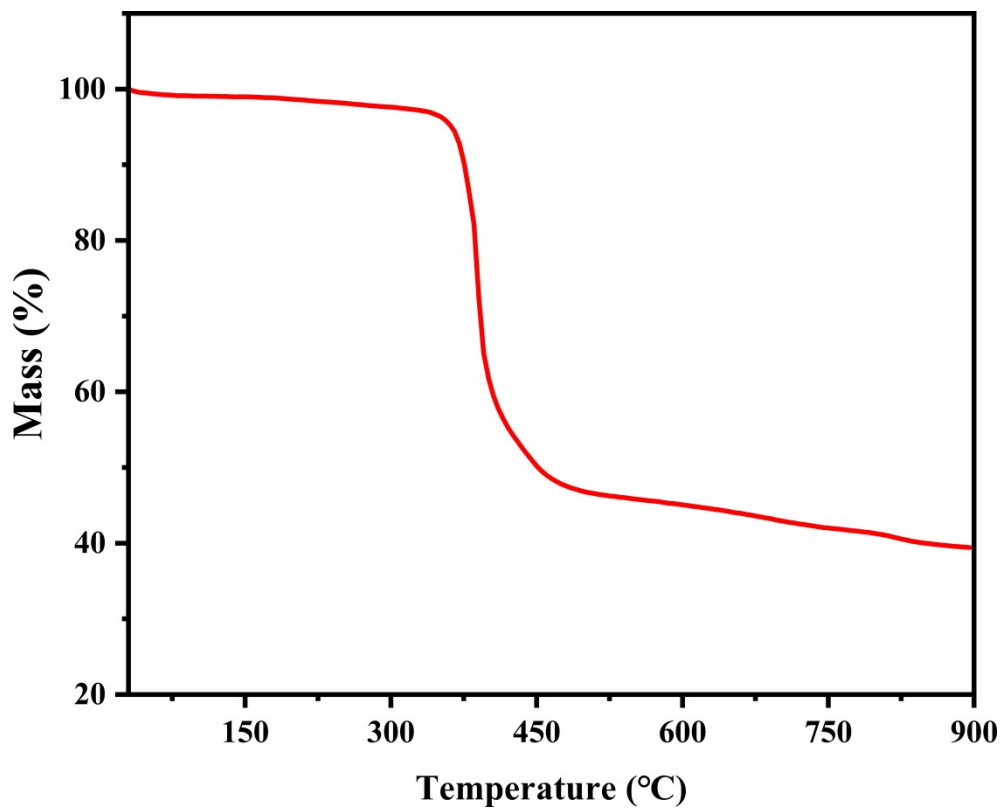

Figure S3. TGA curves of Ni-3-F.

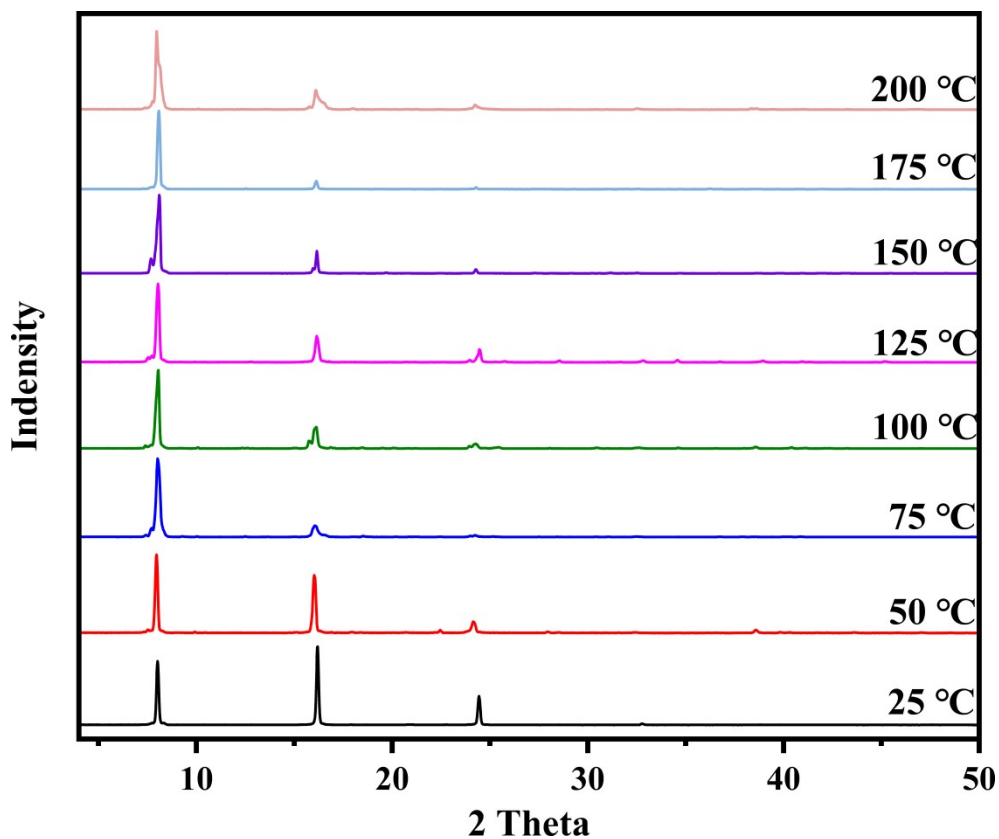

Fig. S4. VT-PXRD patterns of Ni-3-F measured in the air atmosphere.

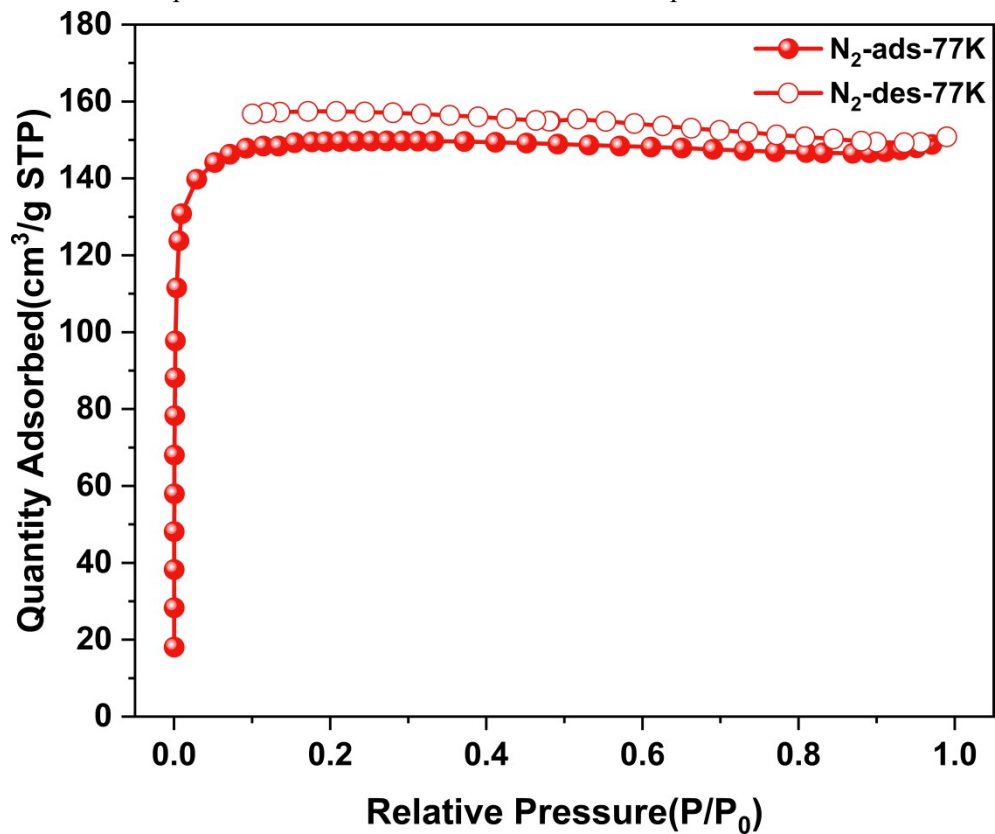

Figure S5. N<sub>2</sub> isotherms at 77 K of Ni-3-F.

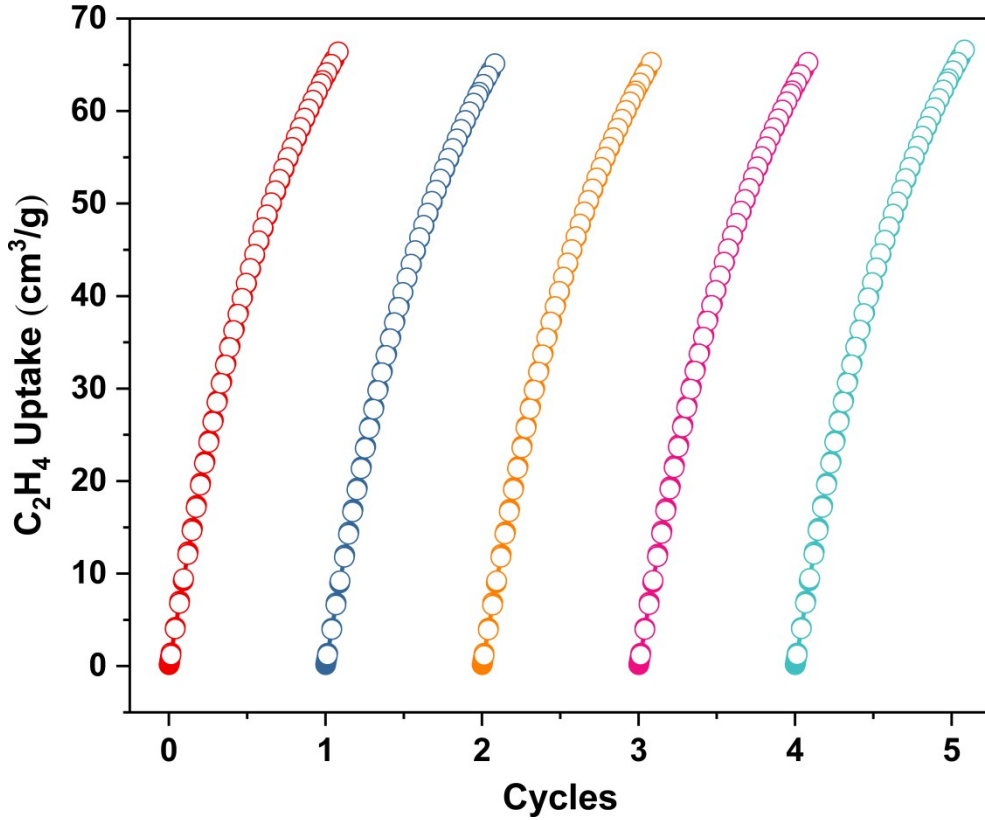

Figure S6. Five cycles C<sub>2</sub>H<sub>4</sub> adsorption isotherms at 298 K.

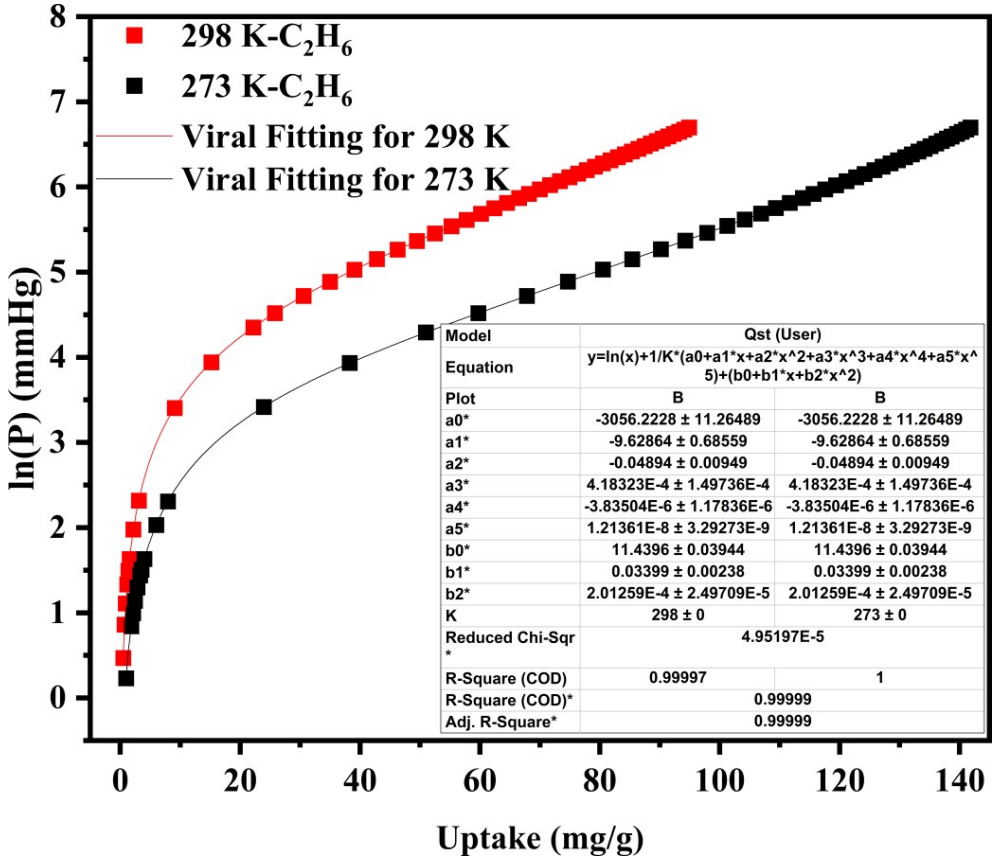

Figure S7. Fitting curve and calculated fitting parameters of C<sub>2</sub>H<sub>6</sub>.

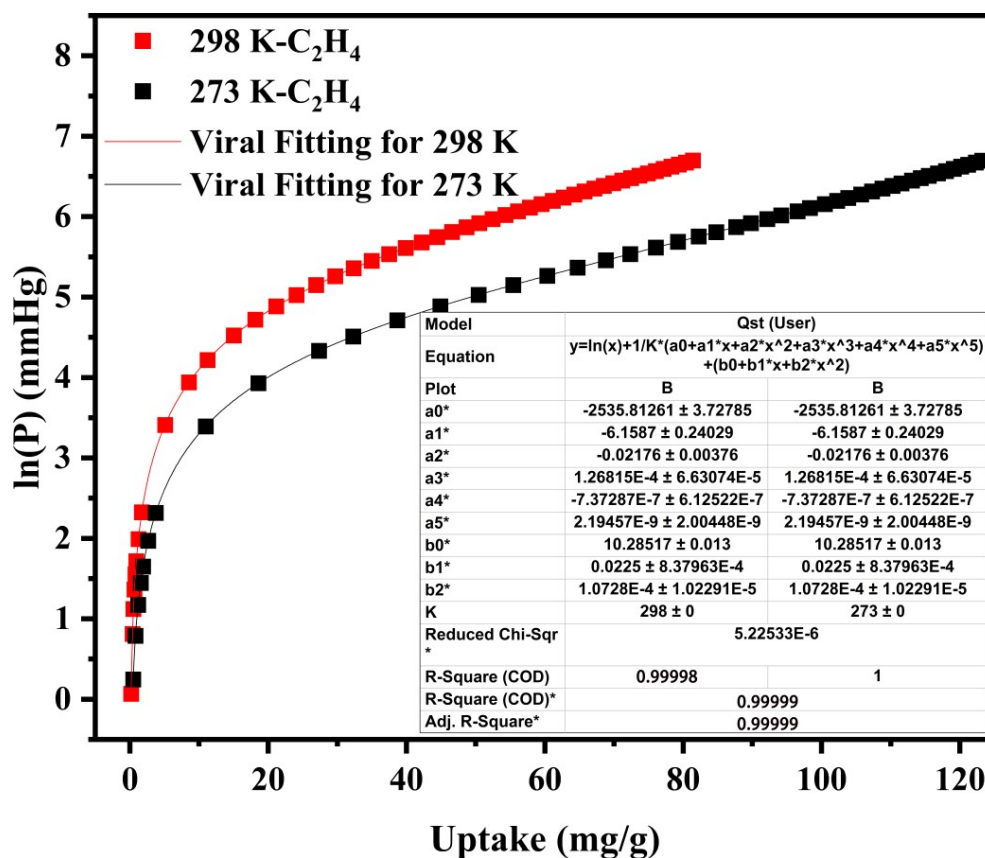

Figure S8. Fitting curve and calculated fitting parameters of C<sub>2</sub>H<sub>4</sub>.

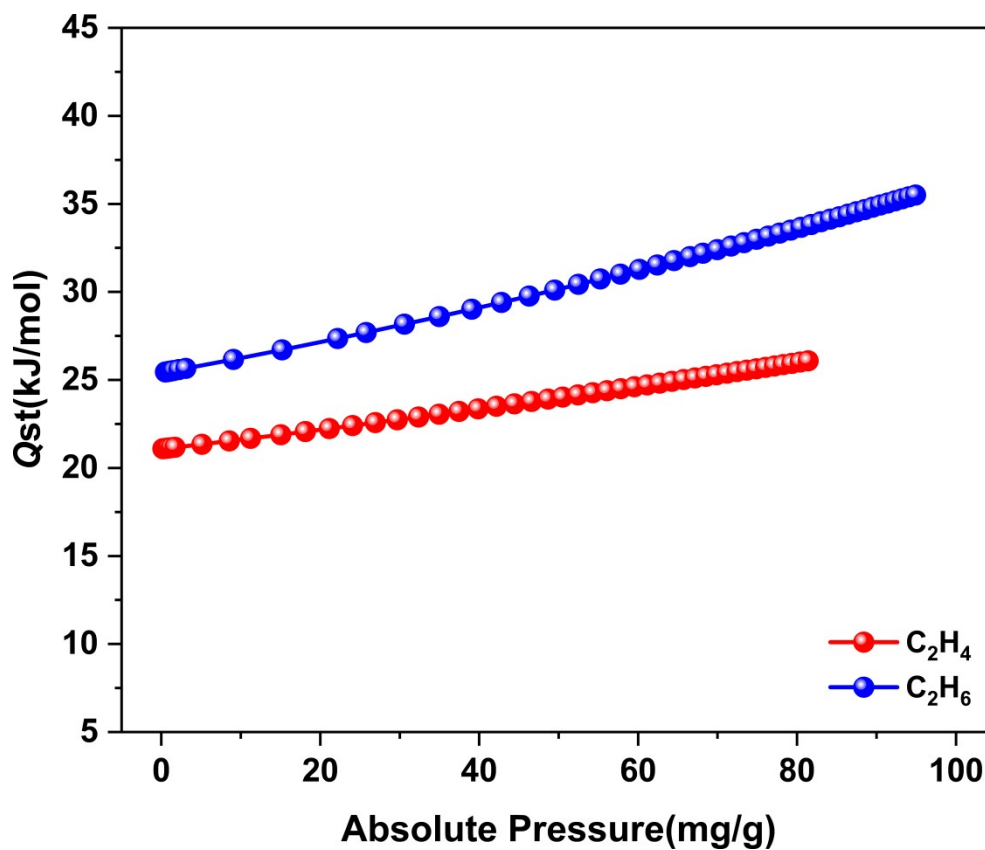

Figure S9. The calculated  $Q_{st}$  of Ni-3-F for  $C_2H_6$  (blue) and  $C_2H_4$  (red) respectively.

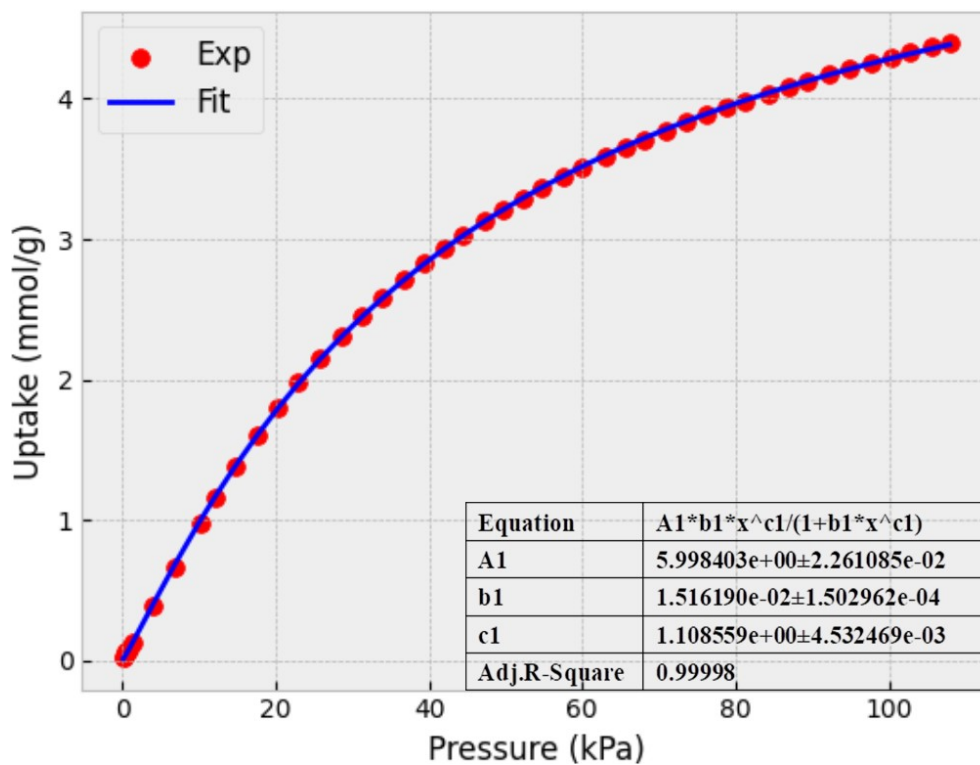

Figure S10.  $C_2H_4$  adsorption isotherms fitting by SSLF model at 273 K.

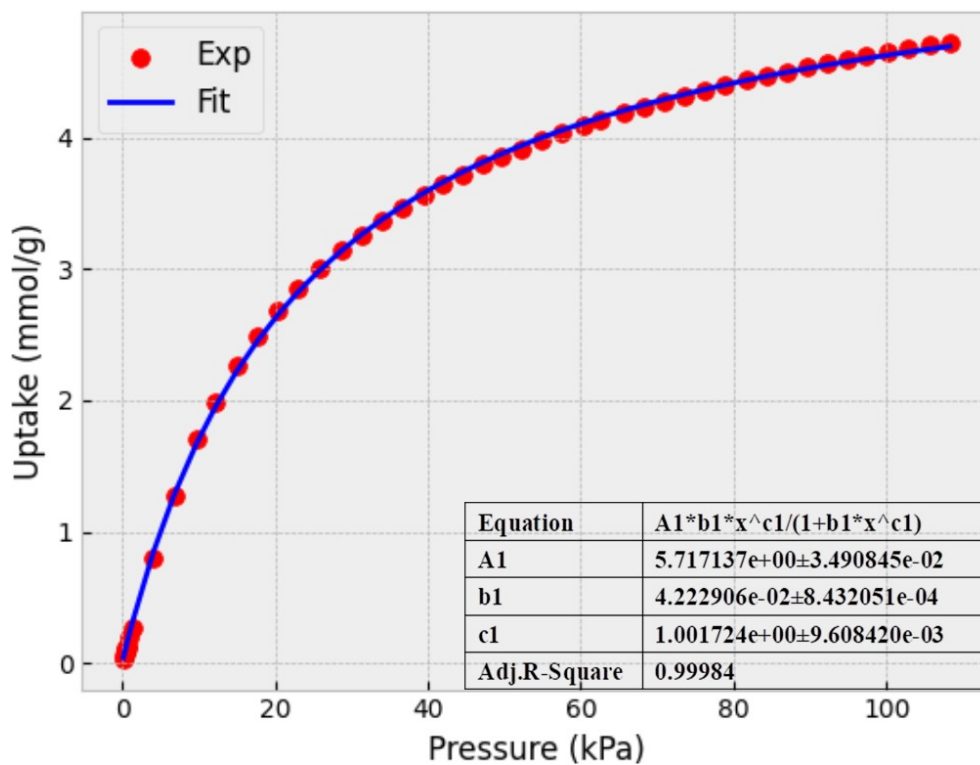

Figure S11.  $C_2H_6$  adsorption isotherms fitting by SSLF model at 273 K.



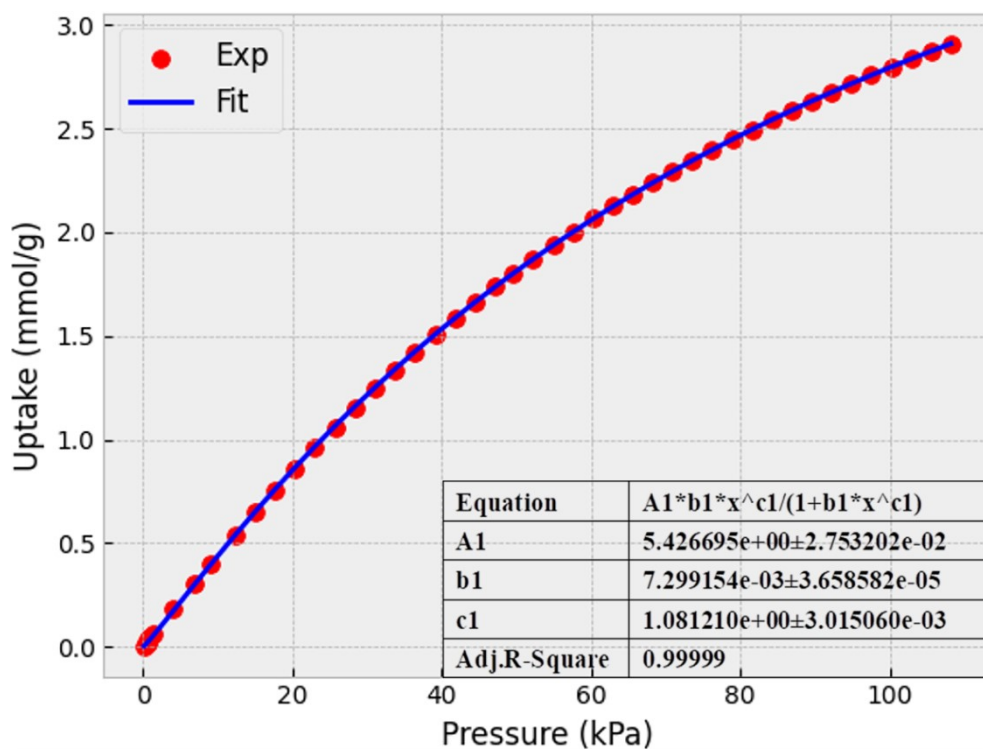

Figure S12. C<sub>2</sub>H<sub>4</sub> adsorption isotherms fitting by SSLF model at 298 K.

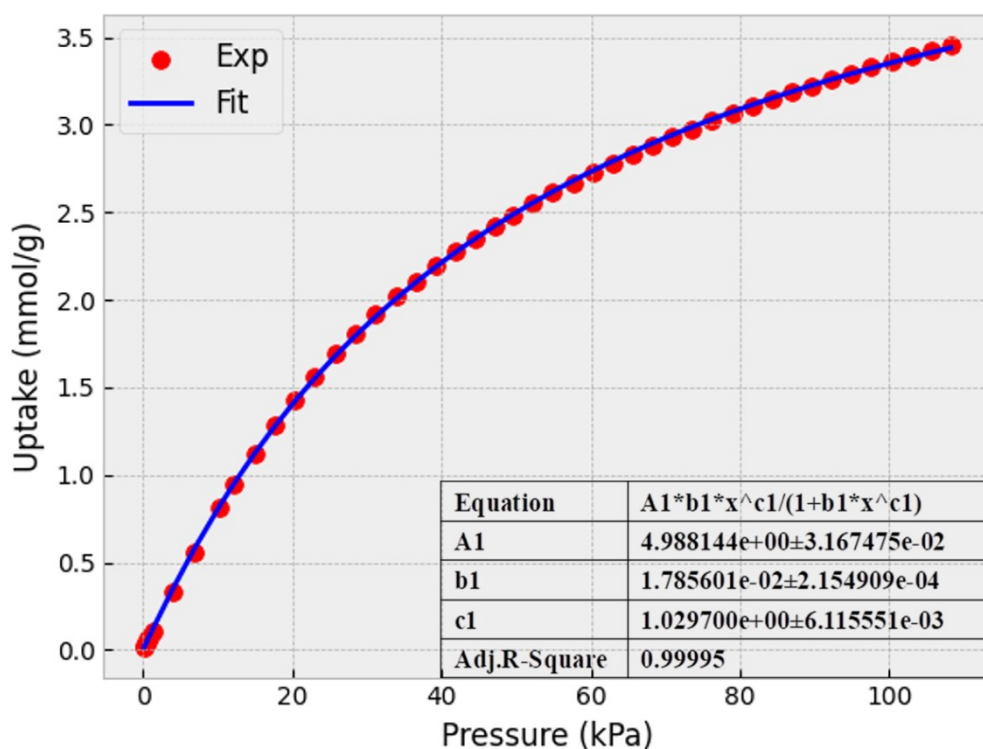

Figure S13. C<sub>2</sub>H<sub>6</sub> adsorption isotherms fitting by SSLF model at 298 K.

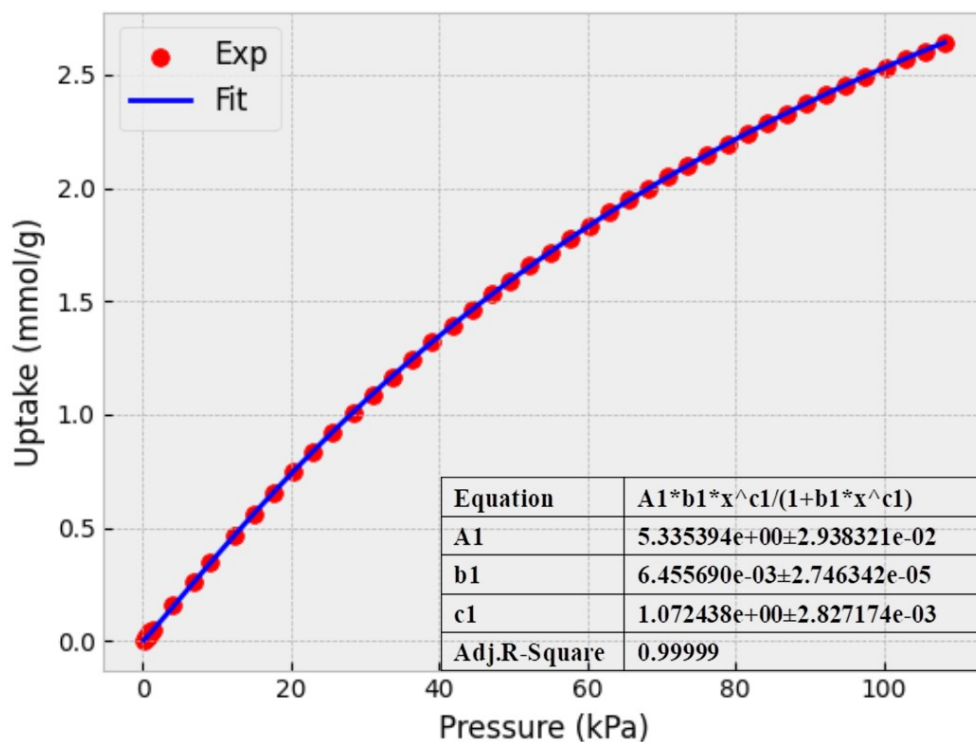

Figure S14. C<sub>2</sub>H<sub>4</sub> adsorption isotherms fitting by SSLF model at 303 K.

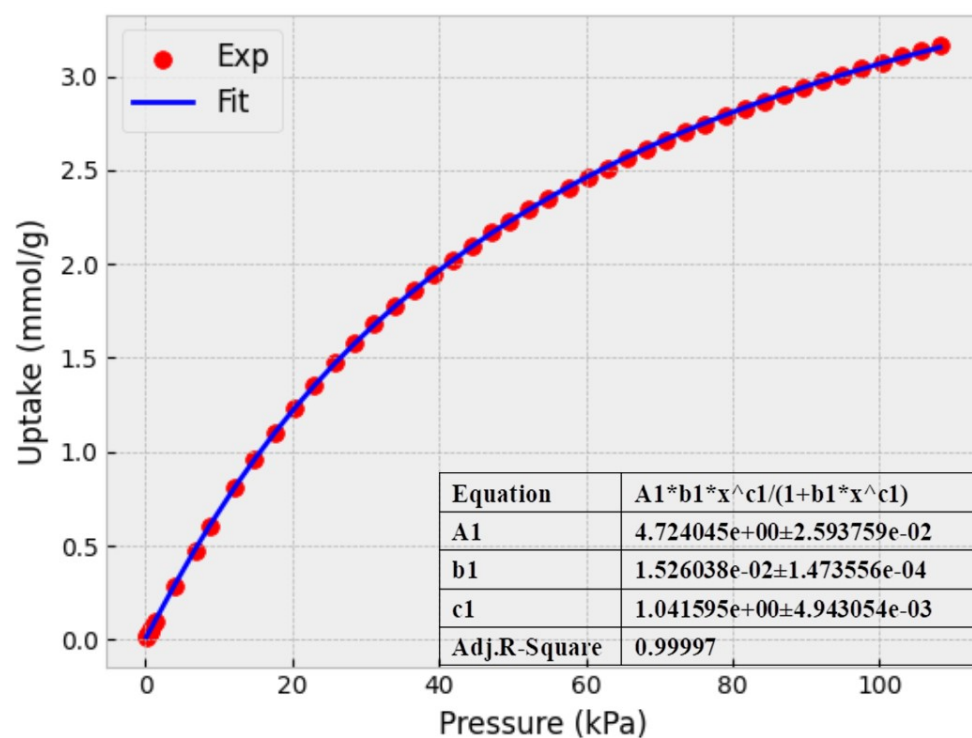

Figure S15. C<sub>2</sub>H<sub>6</sub> adsorption isotherms fitting by SSLF model at 303 K.

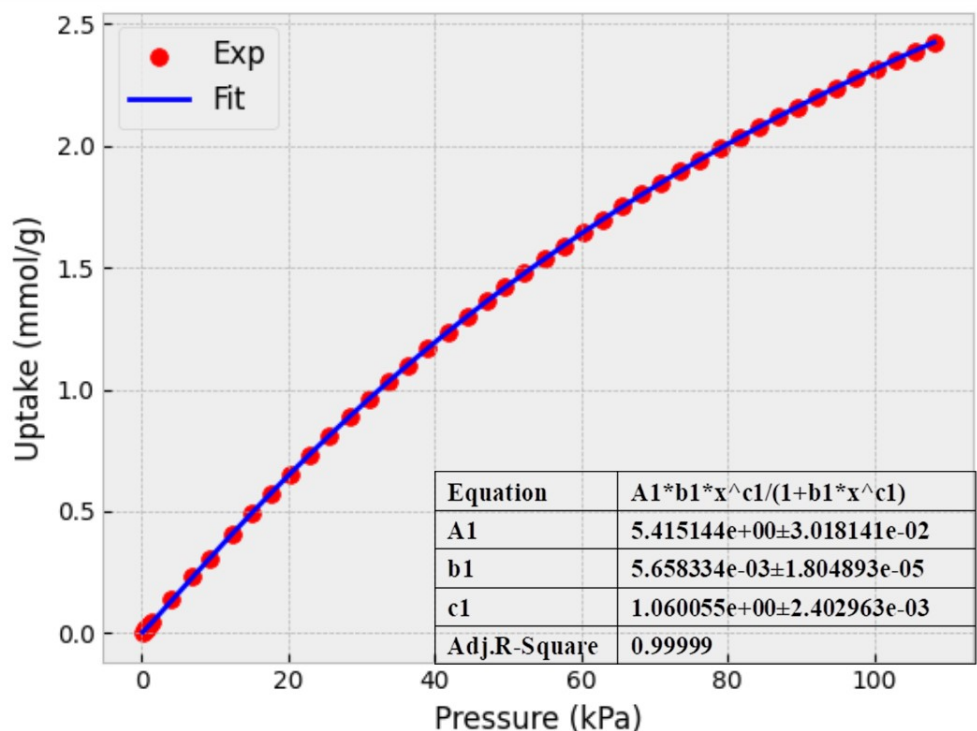

Figure S16. C<sub>2</sub>H<sub>4</sub> adsorption isotherms fitting by SSLF model at 308 K.

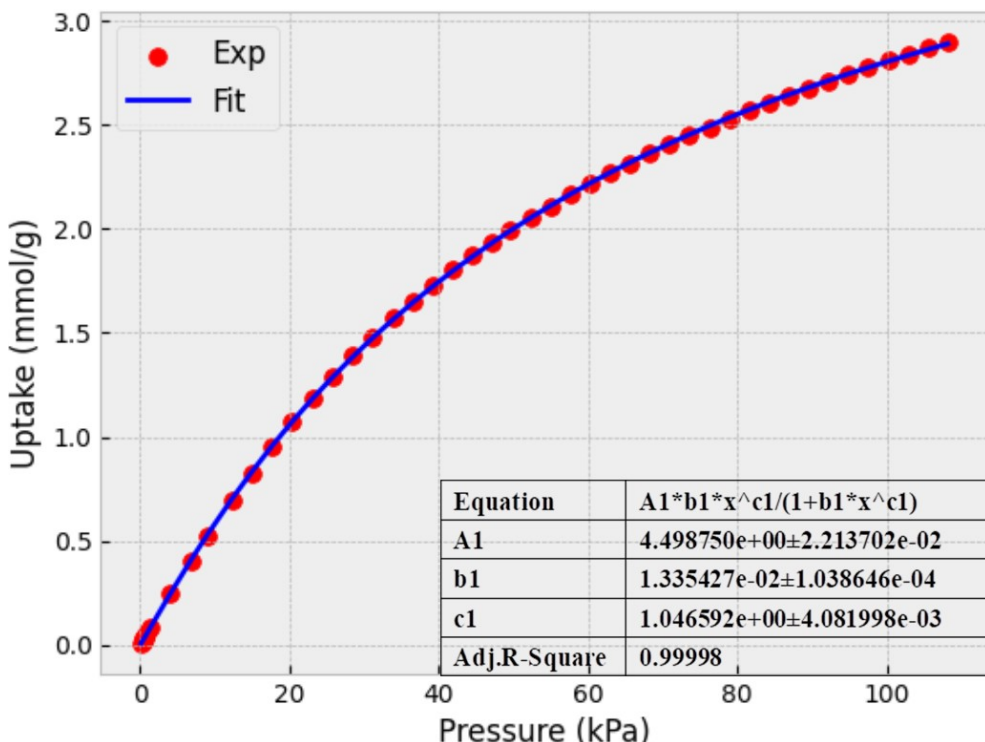

Figure S17. C<sub>2</sub>H<sub>6</sub> adsorption isotherms fitting by SSLF model at 308 K.

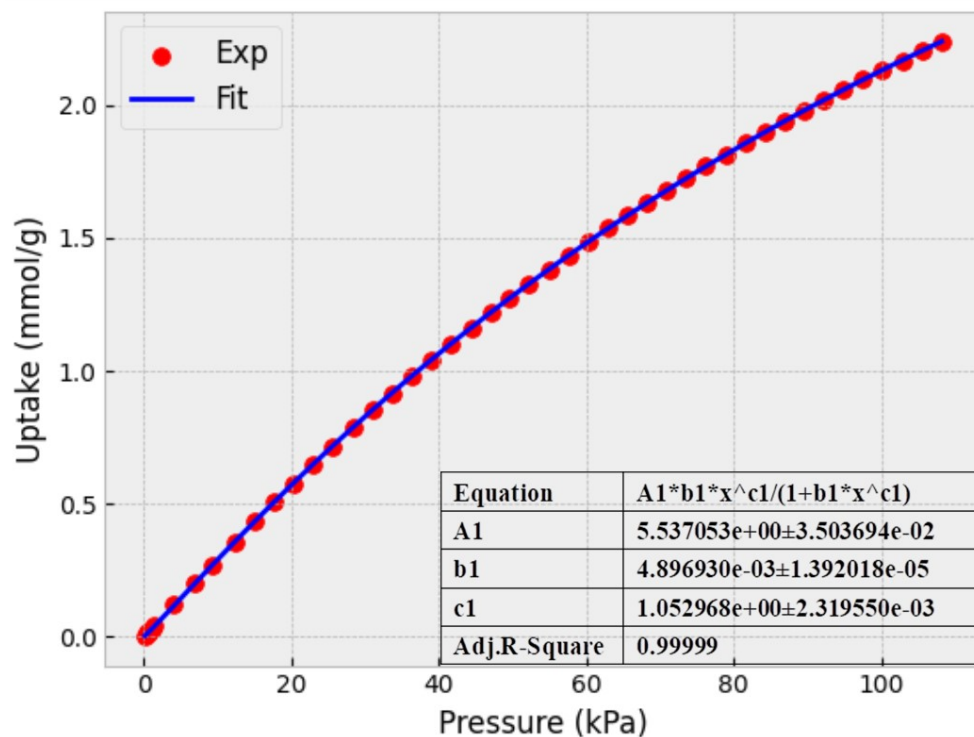

Figure S18. C<sub>2</sub>H<sub>4</sub> adsorption isotherms fitting by SSLF model at 313 K.

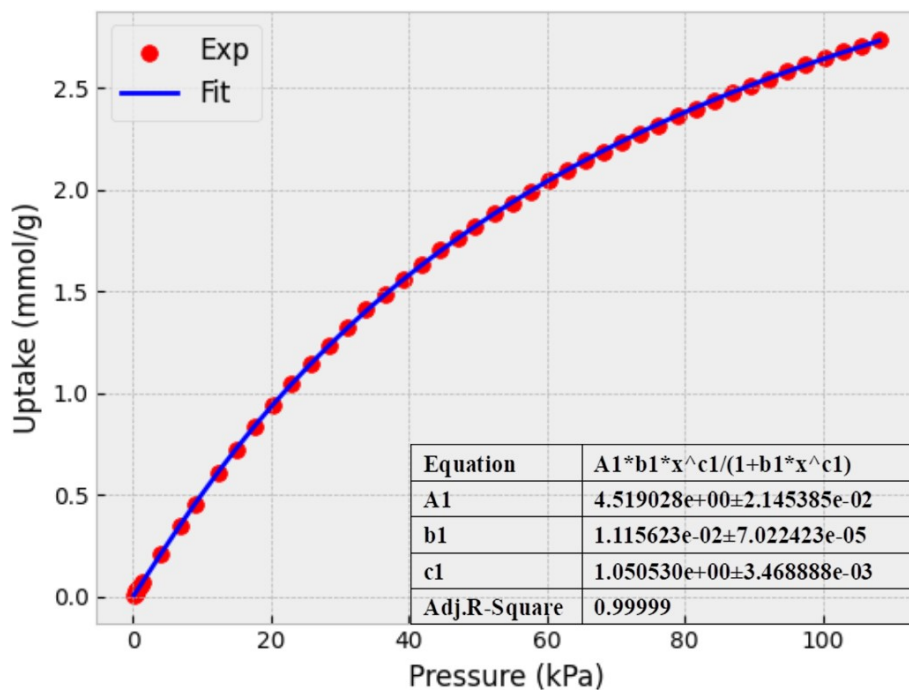

Figure S19. C<sub>2</sub>H<sub>6</sub> adsorption isotherms fitting by SSLF model at 313 K.

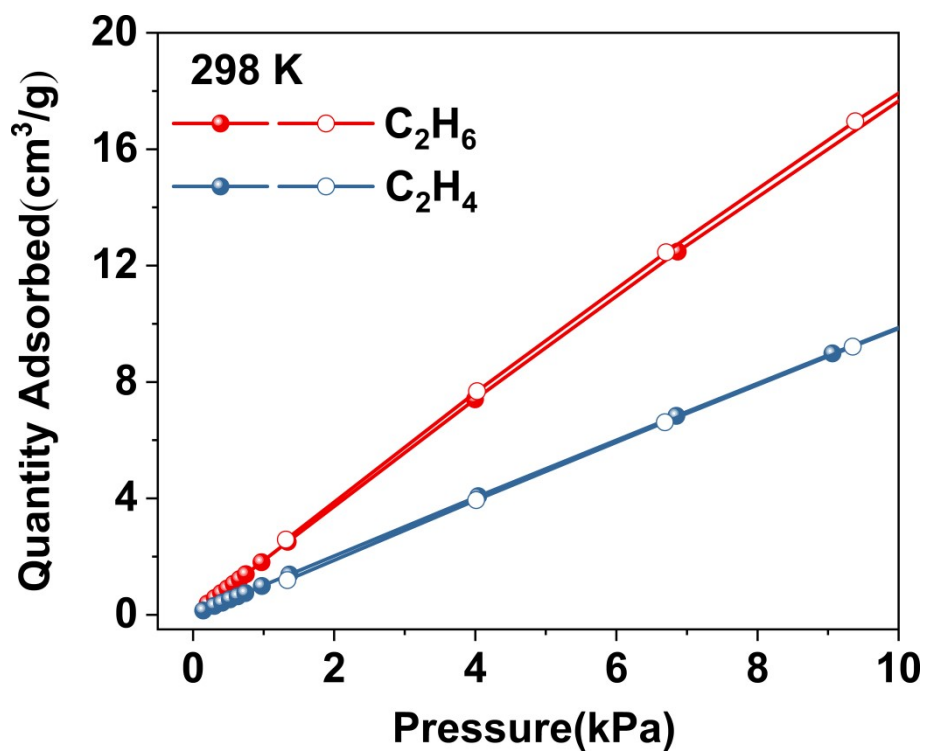

Figure S20. The comparison of C<sub>2</sub>H<sub>6</sub> and C<sub>2</sub>H<sub>4</sub> isotherms of Ni-3-F at 298 K in the 0-10 kPa pressure range.

Table S1. Crystal data and structure refinements for Ni-3-F.

| Compound                                         | Ni-3-F                                                                         |
|--------------------------------------------------|--------------------------------------------------------------------------------|
| CCDC                                             | 2369828                                                                        |
| Empirical formula                                | C <sub>24</sub> H <sub>12</sub> F <sub>2</sub> N <sub>2</sub> NiO <sub>4</sub> |
| Formula weight                                   | 489.05                                                                         |
| Temperature (K)                                  | 100                                                                            |
| Crystal system                                   | orthogonality                                                                  |
| Space group                                      | Pnna                                                                           |
| Unit cell dimensions (Å, deg)                    | a = 17.2804 (4), $\alpha$ = 90                                                 |
|                                                  | b = 12.1294 (3), $\beta$ = 90                                                  |
|                                                  | c = 15.2030 (3), $\gamma$ = 90                                                 |
| Volume (Å <sup>3</sup> )                         | 3186.56                                                                        |
| Z                                                | 8                                                                              |
| Density (calculated) (g/m <sup>3</sup> )         | 1.024                                                                          |
| Absorption coefficient (mm <sup>-1</sup> )       | 1.191                                                                          |
| F <sub>000</sub>                                 | 1000                                                                           |
| $\theta$ for data collection (deg)               | 4.664 to 76.419                                                                |
| Reflections collected                            | 11649                                                                          |
| Goodness-of-fit on F <sup>2</sup>                | 0.985                                                                          |
| Final R indexes [I > 2sigma(I)]                  | R <sub>1</sub> =0.0639, wR <sub>2</sub> =0.1899                                |
| Final R indexes [all data]                       | R <sub>1</sub> =0.0678, wR <sub>2</sub> =0.1940                                |
| Largest diff. peak / hole / (e Å <sup>-3</sup> ) | 0.948 / -0.407                                                                 |

Table S2. Summary of adsorption capacity of C<sub>2</sub>H<sub>6</sub> and C<sub>2</sub>H<sub>4</sub>, IAST (C<sub>2</sub>H<sub>6</sub>/C<sub>2</sub>H<sub>4</sub> (1/99)) and separation potential (C<sub>2</sub>H<sub>6</sub>/C<sub>2</sub>H<sub>4</sub> (1/99)) at different temperatures.

| Temperatures | C <sub>2</sub> H <sub>6</sub> Uptake<br>(cm <sup>3</sup> /g) | C <sub>2</sub> H <sub>4</sub> Uptake<br>(cm <sup>3</sup> /g) | IAST | Separation potential<br>(mmol/g) |
|--------------|--------------------------------------------------------------|--------------------------------------------------------------|------|----------------------------------|
| 273 K        | 105.89                                                       | 98.58                                                        | 1.86 | 3.64                             |
| 298 K        | 77.44                                                        | 65.13                                                        | 1.80 | 2.21                             |
| 303 K        | 70.93                                                        | 59.13                                                        | 1.76 | 1.90                             |
| 308 K        | 64.98                                                        | 54.28                                                        | 1.72 | 1.64                             |
| 313 K        | 61.39                                                        | 50.11                                                        | 1.69 | 1.45                             |

## References

- (1) PRAUSNITZ, A. L. M. a. J. M. Thermodynamics of Mixed-Gas Adsorption. *AIChE journal* **1965**, *11*, 121-130.
- (2) Krishna, R. Metrics for Evaluation and Screening of Metal–Organic Frameworks for Applications in Mixture Separations. *ACS Omega* **2020**, *5*, 16987-17004.
- (3) Krishna, R. Screening metal–organic frameworks for mixture separations in fixed-bed adsorbers using a combined selectivity/capacity metric. *RSC Advances* **2017**, *7*, 35724-35737.
